1 **Acetylation of cytidine residues boosts HIV-1 gene expression by increasing viral**  
2 **RNA stability**

3

4 Kevin Tsai<sup>1</sup>, Ananda Ayyappan Jaguva Vasudevan<sup>1</sup>, Cecilia Martinez Campos<sup>1</sup>, Ann  
5 Emery<sup>2</sup>, Ronald Swanstrom<sup>2,3</sup> and Bryan R. Cullen<sup>1,4</sup>

6

7 <sup>1</sup> Department of Molecular Genetics and Microbiology, Duke University Medical Center,  
8 Durham, NC 27710

9 <sup>2</sup> Lineberger Comprehensive Cancer Center, University of North Carolina at Chapel Hill,  
10 Chapel Hill, NC 27599

11 <sup>3</sup> Department of Biochemistry and Biophysics, University of North Carolina at Chapel Hill,  
12 Chapel Hill, NC 27599

13 <sup>4</sup> Corresponding Author. Contact Information: e-mail; [bryan.cullen@duke.edu](mailto:bryan.cullen@duke.edu). Tel; 919-  
14 684-3369

15

## 16 **Abstract**

17 Covalent modifications added to individual nucleotides on mRNAs, called  
18 epitranscriptomic modifications, have recently emerged as key regulators of both cellular  
19 and viral mRNA function<sup>1,2</sup> and RNA methylation has now been shown to enhance the  
20 replication of human immunodeficiency virus 1 (HIV-1) and several other viruses<sup>3-11</sup>.  
21 Recently, acetylation of the N<sup>4</sup> position of cytidine (ac4C) was reported to boost cellular  
22 mRNA function by increasing mRNA translation and stability<sup>12</sup>. We therefore  
23 hypothesized that ac4C and N-acetyltransferase 10 (NAT10), the cellular enzyme that adds  
24 ac4C to RNAs, might also have been subverted by HIV-1 to increase viral gene expression.  
25 We now confirm that HIV-1 transcripts are indeed modified by addition of ac4C at multiple  
26 discreet sites and demonstrate that silent mutagenesis of a subset of these ac4C addition  
27 sites inhibits HIV-1 gene expression *in cis*. Moreover, reduced expression of NAT10, and  
28 the concomitant decrease in the level of ac4C on viral RNAs, inhibits HIV-1 replication by  
29 reducing HIV-1 RNA stability. Interestingly Remodelin, a previously reported inhibitor of  
30 NAT10 function<sup>13,14</sup>, also inhibits HIV-1 replication without affecting cell viability, thus  
31 raising the possibility that the addition of ac4C to viral mRNAs might emerge as a novel  
32 cellular target for antiviral drug development.

33

34

## 35 **Introduction**

36           Previously, we and others have reported the detection and mapping of several  
37 epitranscriptomic modifications on HIV-1 transcripts<sup>3,4,10,15</sup>. These modifications include  
38 methylation of the N<sup>6</sup> position of adenosine (m<sup>6</sup>A), of the C<sup>5</sup> position of cytidine (m<sup>5</sup>C)  
39 and of the ribose moiety of all four ribonucleotides (2'O-methylation, collectively N<sub>m</sub>). All  
40 three of these epitranscriptomic modifications have now been shown to boost HIV-1  
41 replication in *cis*. Specifically, m<sup>6</sup>A has been reported to increase viral RNA expression<sup>3,4</sup>,  
42 while m<sup>5</sup>C boosts viral mRNA translation<sup>10</sup> and N<sub>m</sub> residues increase HIV-1 replication by  
43 inhibiting activation of the cellular innate immune factor MDA5 by viral RNAs<sup>15</sup>. While  
44 m<sup>6</sup>A, m<sup>5</sup>C and N<sub>m</sub> have therefore all been shown to increase HIV-1 gene expression,  
45 several other epitranscriptomic mRNA modifications remain unexamined. Of particular  
46 interest is the novel mRNA modification ac4C, which was recently reported to enhance  
47 cellular mRNA translation and stability<sup>12</sup> and which has previously been reported to  
48 represent ~0.5% of all nucleotides (~2% of “C” residues) on the HIV-1 genomic RNA  
49 (gRNA), which would equate to ~8 ac4C residues per gRNA<sup>16</sup>. We therefore hypothesized  
50 that addition of ac4C residues to HIV-1 transcripts might also serve to boost HIV-1 gene  
51 expression and replication.

52

## 53 **Results & Discussion**

54           We have previously used photo-assisted (PA) crosslinking of modification-specific  
55 antibodies to 4-thiouridine (4SU)-labelled RNA, followed by RNase footprinting of  
56 antibody-bound RNA and deep sequencing of bound RNA fragments, to map both m<sup>6</sup>A  
57 (PA-m<sup>6</sup>A-seq) and m<sup>5</sup>C (PA-m<sup>5</sup>C-seq) residues on the gRNAs and mRNAs encoded by

58 HIV-1 and other viruses<sup>3,5,6,10</sup>. As an ac4C-specific antibody recently became available, we  
59 asked if a similar approach (PA-ac4C-seq) might also allow us to map ac4C modification  
60 sites on HIV-1 transcripts<sup>17</sup>. In Fig. 1A, we report the PA-ac4C-seq analysis of HIV-1  
61 gRNA, isolated from HIV-1 virions generated in the CEM-SS or SupT1 T cell line, or on  
62 intracellular viral RNAs, isolated from CEM-SS cells. Despite some degree of variability  
63 in signal intensity, we were able to identify ~11 conserved sites of ac4C addition on HIV-  
64 1 transcripts that were detected across these three replicates and on additional replicates  
65 performed in HIV-1 infected CEM cells (Fig. S1), but not in mock infected cells (Note that  
66 the relative weakness of the ac4C sites detected on intracellular RNAs in the *gag*, *pol* and  
67 *env* regions is expected as these regions are removed by splicing in many intracellular viral  
68 RNAs). Analysis of the location of ac4C sites across the host cell transcriptome confirmed  
69 the previous report that the majority of the mapped ac4C residues are located in coding  
70 sequences (CDS)<sup>12</sup>, though a substantial number were also located in 3' untranslated  
71 regions (UTR) (Fig. S1B). Of interest, analysis of all mapped ac4C sites identified a C and  
72 U-rich consensus sequence, with a central “UCU” motif, in both uninfected and HIV-1  
73 infected CEM cells (Fig. S1C).

74

75         If the data reported in Fig. 1A indeed map authentic ac4C addition sites, then loss  
76 of the “writer” acetyltransferase that deposits these marks should result in the loss of  
77 detectable ac4C residues on viral RNAs. Mammals express a single RNA acetyltransferase  
78 capable of acetylating RNA, N-acetyltransferase 10 (NAT10), and NAT10 has indeed been  
79 reported to add ac4C to mRNAs and non-coding RNAs in human cells<sup>12,18,19</sup>. However,  
80 NAT10 appears to be essential in human cells and previous efforts to knock down NAT10

81 expression using gene editing by CRISPR/Cas have therefore focused on an exon, exon 5,  
82 that is found in the majority of, but not all, mRNAs encoding NAT10<sup>12</sup>. We repeated this  
83 strategy in the T cell line CEM and generated 3 clonal cell lines in which all three copies  
84 of the NAT10 gene were edited in exon 5 (Figs. S2A, B and C), resulting in a large decrease  
85 in NAT10 expression (see below). Of note, these clonal cell lines, referred to as  $\Delta$ NAT10  
86 #3, #7 and #9, did not show any decrease in growth rate (Fig. S2D). However, reduced  
87 NAT10 expression did result in the expected strong decline in the level of ac4C residues  
88 present on viral transcripts as measured by PA-ac4C-seq, thus validating these mapped  
89 ac4C sites as authentic (Fig. 1C).

90

91 If NAT10 is indeed the writer that deposits ac4C on cellular and viral RNAs, then  
92 we reasoned it might be possible to detect NAT10 binding to these sites using the photo-  
93 assisted cross linking and immunoprecipitation (PAR-CLIP) technique, as previously  
94 described<sup>3,20</sup>. We therefore used lentiviral expression vectors encoding FLAG-tagged wild  
95 type (WT) NAT10, or FLAG-tagged green fluorescent protein (GFP), to stably express  
96 these proteins in CEM cells. As shown in Fig. 1D, we indeed detected FLAG-NAT10, but  
97 not FLAG-GFP, binding sites on viral transcripts and these were coincident with the  
98 mapped ac4C sites, as expected. Moreover, the mapped NAT10 binding sites conformed  
99 to the same U and C-rich sequence consensus, with a central “UCU” motif, that we had  
100 identified using PA-ac4C-seq (Fig. S1C).

101

102 If ac4C residues indeed facilitate some aspect of HIV-1 gene expression then the  
103 reduced expression of NAT10, and concomitant reduction in ac4C addition to mRNAs,

104 seen in the  $\Delta$ NAT10 CEM cells should result in reduced HIV-1 replication. We analyzed  
105 the level of HIV-1 Gag and NAT10 protein expression in WT and  $\Delta$ NAT10 CEM cells 3  
106 days after infection using WT HIV-1 isolate NL4-3. As may be observed in Fig. 2A, both  
107 NAT10 and the viral Gag proteins are expressed at a much lower level in the  $\Delta$ NAT10  
108 CEM cells, though the GAPDH loading control was unaffected. Similarly, when we  
109 infected WT and  $\Delta$ NAT10 CEM cells with a previously described replication competent  
110 HIV-1 that encodes the Nano luciferase (*NLuc*) gene in place of the dispensable *nef* gene<sup>21</sup>,  
111 we observed a strong reduction in the level of NLuc protein expression (Fig. 2B) and in  
112 the level of viral RNA expression, measured by qRT-PCR using an LTR-specific probe  
113 (Fig. 2C), in the latter. Thus, reduced NAT10 expression indeed results in a lower level of  
114 HIV-1 replication.

115

116 While these data address how lower NAT10 expression affects HIV-1 replication,  
117 it is also possible to inhibit NAT10 function in WT cells using a drug, called Remodelin,  
118 that has been reported to inhibit NAT10 function at concentrations that are non-toxic in  
119 culture or in mice<sup>13,14</sup>. Indeed, we observed that Remodelin reduced HIV-1 replication in  
120 WT CEM cells by up to 70%, but had little effect on HIV-1 replication in the  $\Delta$ NAT10  
121 CEM cells, at concentrations that did not reduce CEM cell growth (Fig. 2D), thus further  
122 validating NAT10 as an HIV-1 co-factor.

123

124 As reduced NAT10 expression or function led to diminished HIV-1 replication  
125 (Figs. 2A-D), we reasoned that NAT10 activity might be rate limiting for HIV-1 replication  
126 in CEM cells. We therefore generated CEM cells stably overexpressing WT NAT10, or

127 mutant forms of NAT10 lacking a functional RNA helicase domain (K290A) or  
128 acetyltransferase domain (G641E) (Fig. 2E), due to mutagenesis of residues previously  
129 shown to be required for RNA acetyltransferase function<sup>14,19</sup>. All three proteins were  
130 expressed at similar levels and at levels that were much higher than endogenous NAT10,  
131 as determined by Western blot (Fig. 2G). Importantly, we detected 4-8x higher levels of  
132 HIV-1 replication in the CEM cells overexpressing WT NAT10, but not with either NAT10  
133 mutant, when compared to the parental CEM cells and this difference was highly  
134 significant (Fig. 2F).

135

136 While the data presented in Fig. 2 demonstrate that NAT10, and the ac4C  
137 modification, promote some aspect(s) of the HIV-1 replication cycle, they do not identify  
138 which step(s) are affected. To address this issue, we performed a single cycle HIV-1  
139 replication assay, using WT NL4-3, in WT or  $\Delta$ NAT10 cells and measured the efficiency  
140 of several different steps in the HIV-1 replication cycle. Initially, we measured the level of  
141 viral Gag expression, which was found to be reduced by ~70%. Measurement of total viral  
142 RNA expression, by qRT-PCR using an LTR-specific probe, also revealed an ~70 %  
143 reduction in the  $\Delta$ NAT10 CEM cells when compared to WT, suggesting an effect primarily  
144 at the RNA level (Fig. 3A). Indeed, analysis of the level of ribosome binding by viral  
145 mRNAs<sup>22</sup>, an assay which had revealed a strong positive effect of the m<sup>5</sup>C modification on  
146 HIV-1 mRNA translation<sup>10</sup>, indicated that the presence or absence of ac4C had no  
147 discernable effect (Fig. 3C). Similarly, reduced ac4C addition did not affect the subcellular  
148 location of HIV-1 transcripts (Fig 3D), or their alternative splicing (Fig. S3A). Importantly,  
149 none of the steps from cell entry, reverse transcription to proviral integration were affected

150 by loss of ac4C, as no difference was found in the total level of HIV-1 DNA (Fig. S3B).  
151 However, the reduced expression of NAT10, and the concomitant loss of ac4C on viral  
152 transcripts, did result in a highly significant reduction in the stability of HIV-1 transcripts  
153 measured either by pulse-chase, using 4SU incorporation into RNA (Fig. 3E)<sup>23,24</sup>, or by use  
154 of the transcription inhibitor actinomycin D (Fig. S3C).

155

156 The data presented in Fig 3 argue that, in the case of HIV-1 RNAs, ac4C acts to  
157 increase viral gene expression primarily by enhancing viral RNA stability. These data  
158 contrast with the previous work proposing that ac4C increases cellular mRNA gene  
159 expression by not only increasing mRNA stability but also translation by increasing the  
160 CDS decoding efficiency<sup>12</sup>. If this is indeed the primary mechanism of action of ac4C, then  
161 only ac4C sites present in the CDS should affect mRNA function in *cis*. To address this  
162 question, we introduced as many silent C to U mutations as possible into conserved ac4C  
163 peaks 4 through 8 in the viral *env* gene region (Fig. 4A and Figs. S4A and B). We then  
164 transfected WT 293T cells, which lack CD4 and therefore will not support a spreading  
165 infection, and measured HIV-1 Gag protein expression. As shown in Figs. 4B and 4C, the  
166 ac4C site mutations introduced into the *env* gene, which would be present exclusively in  
167 the 3' UTR of the viral *gag* mRNA (Fig. 1B), nevertheless reduced Gag protein expression  
168 in *cis*, both in the producer cells (Fig. 4B) and in the supernatant media (Fig. 4C). The  
169 observed reduction of ~60% was not only highly significant but also only slightly less than  
170 seen in the  $\Delta$ NAT10 CEM cells (Fig. 3A).

171



172 It could be argued that the inhibition of Gag expression seen with the *env* gene ac4C  
173 mutant (Figs 4B and C) was not due to loss of ac4C residues but rather due to disruption  
174 of some other sequence element that is functionally significant. To test this idea, we  
175 collected the WT and mutant virions released by the transfected 293T cells, normalized the  
176 p24 level based on Fig. 4C and then infected WT and  $\Delta$ NAT10 CEM cells. We then  
177 measured the level of Gag expression after a single round of replication in these cells by  
178 Western. A representative experiment is shown in Fig. 4D, while a compilation of data  
179 measuring total Gag protein expression (Fig. 4E) or exclusively p24 Gag expression (Fig.  
180 4G) are also presented. We noted a bigger effect on p24 Gag expression than on total Gag  
181 protein expression and therefore present both data sets. As may be observed, the *env* ac4C  
182 site mutations reduced total Gag protein expression by 2.3x, and p24 Gag expression by  
183 4.0x, in the WT CEM cells. In contrast, these same mutations reduced total Gag protein  
184 expression by 1.7x, and p24 expression by 2.1x, in the  $\Delta$ NAT10 CEM cells, and these  
185 differences are statistically significant. Therefore, these data demonstrate that the  
186 mutagenesis of mapped *env* ac4C sites indeed results a stronger inhibitory phenotype in  
187 CEM cells expressing WT levels of NAT10 than in the  $\Delta$ NAT10 CEM cells that express  
188 reduced levels of NAT10, as would be predicted if they indeed act via the same mechanism.

189

190 Previously, several groups have reported that the epitranscriptomic addition of m<sup>6</sup>A  
191 to viral transcripts can significantly enhance the replication of a range of different viruses,  
192 including HIV-1, influenza A virus, SV40, enterovirus 71, respiratory syncytial virus and  
193 Kaposi's sarcoma-associated herpesvirus<sup>3-9,11</sup>. Less is known about other epitranscriptomic  
194 viral RNA modifications, though both m<sup>5</sup>C and N<sub>m</sub> residues have been detected on HIV-1

195 transcripts at levels that are substantially higher than seen on cellular mRNAs and both  
196 m<sup>5</sup>C and N<sub>m</sub> have been reported to enhance HIV-1 replication in culture<sup>10,15</sup>. Interestingly,  
197 the proposed mechanisms used by these distinct epitranscriptomic modifications appear  
198 distinct in that m<sup>6</sup>A has been proposed to increase viral mRNA expression levels<sup>3,4</sup> while  
199 m<sup>5</sup>C acts primarily by boosting viral mRNA translation<sup>10</sup>. Finally N<sub>m</sub> has been reported to  
200 increase HIV-1 replication indirectly by preventing the activation of the host innate  
201 immune factor MDA5 by viral transcripts<sup>15</sup>. Here, we extend this previous work by looking  
202 at a novel epitranscriptomic modification, ac4C, that has been proposed to boost cellular  
203 mRNA translation and stability<sup>12</sup> and that has also been detected on purified HIV-1  
204 genomic RNA<sup>16</sup>. We have mapped the ac4C residues present on HIV-1 RNAs to ~11  
205 distinct sites and show that these are, as expected, deposited by the host acetyltransferase  
206 NAT10, as inhibition of NAT10 expression results in a loss of ac4C from viral RNAs  
207 (Fig.1). Importantly, the loss of ac4C modifications from viral transcripts results in reduced  
208 viral gene expression and replication whether caused by a reduction in NAT10 expression  
209 due to gene editing (Figs. 2A and B and Fig. 3), inhibition of NAT10 function using the  
210 drug Remodelin (Fig. 2D) or by mutagenesis of mapped ac4C sites (Fig. 4). However, in  
211 the case of HIV-1 transcripts, the positive effect of ac4C modifications appears to be due  
212 entirely to stabilization of viral transcripts (Figs. 3E and S3C). In contrast, Arango et al.<sup>12</sup>  
213 reported that ac4C residues in cellular CDS not only increased mRNA stability but also  
214 increased mRNA translation, by increasing decoding efficiency. We did not observe any  
215 increase in ribosome recruitment to HIV-1 mRNAs (Fig. 3C), a result that contrasts with  
216 what we observed for m<sup>5</sup>C, which in our hands clearly enhanced HIV-1 mRNA  
217 translation<sup>10</sup>. Moreover, we observed that mutagenesis of ac4C sites in the viral *env* gene,

218 which forms part of the 3' UTR of viral mRNAs encoding Gag, nevertheless resulted in a  
219 marked drop in Gag protein expression (Figs. 4B and C). It remains unclear whether this  
220 indicates that ac4C acts differently on HIV-1 and cellular mRNAs or whether HIV-1  
221 mRNAs are already maximally optimized for ribosome decoding and therefore this  
222 parameter cannot be further enhanced by ac4C. Regardless, these data do clearly  
223 demonstrate that NAT10 adds ac4C to HIV-1 transcripts at multiple discrete locations and  
224 identify ac4C as the fourth epitranscriptomic modification to enhance viral replication in  
225 *cis*.

226

## 227 **Methods**

### 228 **Cell lines**

229 CEM, CEM-SS and SupT1 are CD4<sup>+</sup> T cell lines that were obtained from the NIH  
230 AIDS reagent program. T cell lines were cultured in Roswell Park Memorial Institute  
231 (RPMI) 1640 medium supplemented with 10% fetal bovine serum (FBS) and 1%  
232 Antibiotic-Antimycotic (Gibco, 15240062). 293T cells were cultured in Dulbecco's  
233 Modified Eagle's Medium (DMEM) with 6% FBS and 1% Antibiotic-Antimycotic.  
234 ΔNAT10 CEM cells were produced by transducing CEM cells with a lentiviral vector,  
235 LentiCRISPRv2<sup>25</sup>, encoding Cas9 and single guide RNAs (sgRNAs) 5'-  
236 TGAGTTCATGGTCCGTAGG-3' (as previously published<sup>12</sup>) or 5'-  
237 GGCTAGTGGTCATCCTCCTA-3' (GeCKOv2, guide number HGLibA\_31166). Two  
238 days post-transduction, cells were subjected to 1-2 weeks of selection in 1 μg/ml  
239 puromycin, then single cell cloned by limiting dilution. Control CEM cells were produced  
240 by transduction with a lentiviral vector expressing a non-targeting sgRNA specific for GFP

241 (5'-GTAGGTCAGGGTGGTCACGA-3'), then puromycin selected and single cell cloned.  
242 To validate CRISPR mutations, genomic DNA from knockdown cell lines was extracted  
243 using the Zymo Quick-DNA Miniprep Plus kit (#11-397). The genomic region flanking  
244 the Cas9 target site from each  $\Delta$ NAT10 cell line was PCR amplified and cloned into the  
245 XbaI/SalI sites of pGEM-3zf+ vector (Promega). 10+ bacterial cell clones of pGEM-  
246 genomic-region-plasmid from each CRISPR-knockdown cell clone were isolated for  
247 Sanger sequencing. CEM cells constitutively expressing FLAG-NAT10 or FLAG-GFP  
248 were produced using lentiviral expression vectors pLEX-FLAG-NAT10 (as described  
249 below) or pLEX-FLAG-GFP (previously described<sup>3</sup>), following the same transduction and  
250 single cell selection process as above.

251

## 252 **Antibodies**

253 Antibodies used in this study include: Anti-ac4C, a generous gift from Dr. Shalini  
254 Oberdoerffer (NIH, NCI)<sup>17</sup>, a later batch was purchased from Abcam ab252215. NAT10,  
255 Proteintech 13365-1-AP. FLAG antibody clone M2, Sigma F1804. GAPDH, Proteintech  
256 60004-1-Ig.  $\beta$ -Actin, Proteintech 66009-1-Ig. Lamin A/C clone E-1, Santa Cruz, sc-  
257 376248. Anti-Mouse HRP, Sigma A9044. Anti-Rabbit HRP, Sigma A6154. HIV-1 p24  
258 Gag Monoclonal (#24-3) from Dr. Michael H. Malim<sup>26</sup>.

259

## 260 **Viruses**

261 Recombinant virus clones used include the laboratory strain NL4-3 (NIH AIDS  
262 Reagent, #114)<sup>27</sup> and the nano-luciferase reporter virus NL4-3-NLuc<sup>21</sup>. A mutant NL4-3  
263 virus with most ac4C sites in *env* silently mutated was cloned by replacing the SalI-NheI  
264 and NheI-BamHI segments of *env* with gBlocks (IDT) designed to mutate any C in

265 identified ac4C peaks that could be mutated without changing the encoded amino acid. All  
266 viruses were produced by transfecting the viral expression plasmid into 293T cells using  
267 polyethylenimine (PEI, 2 µg plasmid for a 6 well plate, 10 µg for a 10cm plate, 20µg for a  
268 20cm plate, PEI used at 2.5x the µg amount of plasmid DNA). 24 hours post-transfection,  
269 the media were replaced with fresh media. The supernatant media were collected at 72  
270 hours post-infection (hpi), passed through a 0.45µm filter, then overlaid onto target cells.

271

### 272 **PA-ac4C-seq**

273 Harvest of cellular and virion RNA for modification mapping was performed as  
274 previously reported<sup>10</sup>. CEM or SupT1 cells were resuspended in filtered supernatant media  
275 from NL4-3-transfected 293T cells. Mock-infected cells were resuspended in filtered  
276 media from non-transfected 293T cells. The media were replaced with fresh media at 24  
277 hpi to reduce carry over of 293T-produced virions. Cells were pulsed with 100µM 4SU at  
278 48 hpi and incubated an additional 24 hours. At 72 hpi, cells were collected for extraction  
279 of total RNA using Trizol (Invitrogen), followed by mRNA enrichment using the  
280 Poly(A)Purist MAG Kit (Ambion). For virion RNA, the supernatant of infected cells was  
281 concentrated through Centricon Plus-70 centrifugal filters (100,000 NMWL membrane,  
282 Millipore), then the virions were pelleted by ultracentrifugation through a 20% sucrose  
283 cushion at 38,000 rpm for 90 min. The resulting virus pellet was lysed in Trizol for RNA  
284 extraction. Cellular poly(A)<sup>+</sup> RNA and virion RNA were then subjected to ac4C site  
285 recovery following the PA-m<sup>6</sup>A-seq protocol<sup>6,10,28</sup>. with two modifications: an ac4C-  
286 specific antibody was used, and the incubation of antibody with RNA was overnight.

287

288 **PAR-CLIP**

289 Single cell cloned CEM cells expressing FLAG-GFP or FLAG-NAT10 were used.  
290 Ten 15 cm plates of 293T cells were seeded to package virus for each (GFP+ or NAT10+)  
291 infection. Four days post pNL4-3 transfection, the virus-containing supernatant media were  
292 harvested and filtered through a 0.45 $\mu$ M filter. 300 million FLAG-GFP or FLAG-NAT10  
293 expressing CEM cells were resuspended in the filtered media. At 48 hp, infected cells were  
294 pelleted and resuspended in 350 ml of fresh RPMI supplemented with 100 $\mu$ M 4SU. At 72  
295 hpi, cells were collected, washed twice in PBS, then irradiated with 2500 $\times$ 100  $\mu$ J/cm<sup>2</sup> of  
296 365 nm UV. The above procedure was repeated twice to obtain sufficient biomass to  
297 perform PAR-CLIP, as previously described<sup>3,20</sup>, using an anti-FLAG antibody.

298

299 **Illumina sequencing & bioinformatic data analysis**

300 RNA recovered from the PA-ac4C-seq and PAR-CLIP procedures were used for  
301 cDNA library preparation using the NEBNext Small RNA Library Prep Set for Illumina  
302 (NEB E7330S), then sequenced using Illumina NextSeq 500, or NovaSeq 6000  
303 sequencers at the Duke Center for Genomic and Computational Biology (GCB)  
304 Sequencing and Genomic Technologies Shared Resource. Sequencing data analysis was  
305 done as previously described<sup>6,10</sup>. Sequencing reads >15 nt with fastq quality score >33  
306 were first aligned to the human genome (hg19) using Bowtie<sup>29</sup>. The human-non-aligning  
307 reads were then aligned (allowing up to 1 mismatch) to the HIV-1 NL4-3 sequence with a  
308 single copy of the long terminal repeat (LTR, U5 on the 5' end, and U3-R on the 3' end),  
309 essentially 551-9626 nt of GenBank AF324493.2. As UV-crosslinked 4SU results in  
310 characteristic T>C conversions, an in-house Perl script was used to discard alignments

311 devoid of T>C mutations. After file format conversions using SAMtools<sup>30</sup>, data was  
312 visualized using IGV<sup>31</sup>. For meta-gene analysis and motif analysis, the human-aligned  
313 PA-ac4C-seq reads were subjected to peak calling using MACS2<sup>32</sup> (parameters --  
314 nomodel --tsize=50 --extsize 32 --shift 0 --keep-dup all -g hs). Peak calling on the  
315 NAT10 PAR-CLIP data was done using PARalyzer v1.1<sup>33</sup> (with the parameters:  
316 BANDWIDTH=3 CONVERSION=T>C  
317 MINIMUM\_READ\_COUNT\_PER\_GROUP=10  
318 MINIMUM\_READ\_COUNT\_PER\_CLUSTER=3  
319 MINIMUM\_READ\_COUNT\_FOR\_KDE=5 MINIMUM\_CLUSTER\_SIZE=15  
320 MINIMUM\_CONVERSION\_LOCATIONS\_FOR\_CLUSTER=2  
321 MINIMUM\_CONVERSION\_COUNT\_FOR\_CLUSTER=2  
322 MINIMUM\_READ\_COUNT\_FOR\_CLUSTER\_INCLUSION=2  
323 MINIMUM\_READ\_LENGTH=10  
324 MAXIMUM\_NUMBER\_OF\_NON\_CONVERSION\_MISMATCHES=1  
325 EXTEND\_BY\_READ). Motif analysis was then performed using MEME following a  
326 published m<sup>6</sup>A-seq pipeline<sup>34</sup>. Metagene analysis was performed using metaPlotR<sup>35</sup>.  
327

### 328 **Expression plasmid construction**

329 A NAT10 cDNA was cloned by PCR from CEM-SS cDNA, digested and ligated  
330 into the NotI and EcoRI sites of pK-FLAG-VP1<sup>6</sup>, placing NAT10 3' to a 2xFLAG tag and  
331 replacing SV40 VP1. The NAT10 cDNA sequence was confirmed as wild type by Sanger  
332 DNA sequencing. The K290A & G641E point mutants were introduced by recombinant  
333 PCR: two complementing PCR primers were designed to overlap the mutated region, with

334 the point mutant sequence in the middle. A first round of PCR was done to separately  
335 amplify the 5'end-to-mutation site and the mutation site-to-3'end fragments of NAT10,  
336 yielding two fragments with a region of homology around the mutation site. Using two  
337 outer primers, the two fragments were joined and amplified into the full length NAT10  
338 CDS containing the point mutation and then ligated into the NotI and EcoRI sites of pK-  
339 FLAG as before. The lentiviral expression construct pLEX-FLAG-NAT10 was constructed  
340 by cloning the PCR amplified FLAG-NAT10 cDNA from pK-FLAG-NAT10 into the  
341 BamHI and AgeI sites of the pLEX vector (Openbiosystems). All PCR primers used are  
342 listed in Supplemental Table 1.

343

#### 344 **Viral infection of 293T cells**

345 293T cells seeded in 6 well plates were transfected using PEI with 1.6  $\mu$ g of pK-  
346 FLAG-NAT10 plasmids or empty pK vector, along with 250 ng of CD4 expression  
347 vector<sup>36</sup>, and 100 ng of firefly luciferase (FLuc) expression plasmid pcDNA3-FLuc. In  
348 parallel, 10 $\mu$ g of pNL43-NLuc was transfected into 293T cells in 10 cm plates. All media  
349 were changed the next day, and the NAT10/CD4/FLuc+ infected target cells split into 12  
350 well plates two days later. NL43-NLuc virus-containing supernatant was harvested on day  
351 3, filtered and brought up to 12mls with fresh media, and overlaid onto target cells at 1ml  
352 virus per well. At 2 or 3dpi, the supernatant media was removed from infected cells, the  
353 cells washed 3x with PBS, then lysed in passive lysis buffer (Promega, E1941). NLuc and  
354 FLuc activity was assayed using the Nano Luciferase Assay Kit and Luciferase Assay  
355 System (Promega, N1120 & E1500).

356



357 **Remodelin assays**

358 Control or  $\Delta$ NAT10 CEM cells were seeded at 0.75 million cells per well in 1ml in  
359 a 12 well plate, and treated with Remodelin (Sigma SML1112-5MG, dissolved in DMSO  
360 to 2mM) at the needed concentration. Lower concentration sets were compensated with  
361 equal volumes of DMSO. The next day, cells were overlaid with 1 ml of NL4-3 virus.  
362 Additional drug was added to compensate for the additional 1 ml volume of the virus. To  
363 compensate for potential drug decay over 3 days, 0.25x additional drug was added at 2  
364 days post initial drug treatment. Cells were counted at 24 hpi to assess toxicity and  
365 harvested at 48 hpi for assay of viral RNA levels.

366

367 **Viral infection of wild type and  $\Delta$ NAT10 CEM cells**

368 NL4-3 virus was packaged in 293T cells in 10 cm plates, transfected with 10  $\mu$ g of  
369 pNL4-3 using PEI, the media were replaced the next day with 10 ml RPMI. 3 days post-  
370 transfection, CEM cells were counted and seeded at 1 million cells per well in 0.5 ml RPMI  
371 in 12 well plates. Virus-containing supernatant media harvested from 293T cells were  
372 filtered and supplemented with fresh RPMI to a total volume of 12 ml. 1 ml of this virus  
373 was then used to overlay the 1 million cells/0.5 ml in 12 well plates. For spreading  
374 infections, cells were harvested and PBS washed at 72 hpi. For single-round infections,  
375 cells were treated with 133 $\mu$ M of the reverse transcriptase inhibitor Nevirapine (Sigma  
376 SML0097) at 16 hpi, then harvested at 48 hpi.

377 Viral RNA levels in infected cells were measured using quantitative real time-PCR  
378 (qRT-PCR). Harvested cells were washed in PBS, then the RNA extracted using Trizol  
379 (Invitrogen). Total RNA was then treated with DNase I (NEB), and reverse transcribed

380 using the Super Script III reverse transcriptase (Invitrogen). qPCR was performed with  
381 Power SYBR Green Master Mix (ABI), with primers targeting either the U3 region of HIV-  
382 1 LTR or spanning splice donor 1 and splice acceptor 1 (D1-A1). qPCR readouts were  
383 normalized to GAPDH levels using the delta-delta Ct (ddCt) method. All PCR primers  
384 used are listed in Supplemental Table 1. Sub-cellular fractionation and ribosome  
385 association assays were done on single-round infected cells, as previously described for  
386 fractionation<sup>6,37</sup> and ribosome association<sup>10,22</sup>. HIV-1 RNA splicing was assayed by  
387 Primer-ID tagged deep sequencing<sup>10,38</sup>. HIV-1 Gag protein expression levels were  
388 analyzed by Western blot. Western blot band intensity was quantified using Image J  
389 software. Released viral particles were quantified using an HIV-1 p24 antigen capture  
390 ELISA assay (Advanced Bioscience Laboratories #5421).

391

### 392 **RNA decay assays**

393 The nascent RNA isolation method used is a combination of two protocols<sup>23,24</sup>.  
394 Single-round-infected cells were pulsed at 48 hpi with 150  $\mu$ M 4SU for 1.5 hours, the cells  
395 then washed and resuspended in 4SU-free fresh RPMI. Cells were collected at 0, 2, and 4  
396 h after 4SU wash out and RNA extracted using Trizol. 500 ng of MTSEA-biotin-XX  
397 (Biotium 89139-636) dissolved in 10  $\mu$ l of Dimethyl formamide (Sigma D4551) was used  
398 to biotinylate 6  $\mu$ g of RNA in a 50  $\mu$ l reaction mixture with 20mM HEPES pH7.4 and 1mM  
399 EDTA at room temperature for 30 min. Excess biotin was removed by two rounds of  
400 chloroform extraction followed by isopropanol precipitation of RNA. 100  $\mu$ g of  
401 streptavidin magnetic beads (NEB, S1420S) were pre-blocked with glycogen, then co-  
402 incubated with the Biotinylated-4SU+ RNA at room temperature for 15 min. The resulting

403 RNA-bead complex was washed 3x with wash buffer (10mM Tris HCl pH7.4, 100mM  
404 NaCl, 1mM EDTA, 0.005% Tween-20). Elution was done twice with 25 $\mu$ l of freshly made  
405 elution buffer (20mM HEPES pH7.4, 100mM DTT, 1mM EDTA, 100mM NaCl, 0.05%  
406 Tween-20), followed by RNA purification with the Zymo RNA Clean & Concentrator-5  
407 kit (#11-326). For the transcription stop method, single-round-infected cells were treated  
408 at 48 hpi with 5 $\mu$ g/ml Actinomycin D (Sigma A9415), and harvested 0, 2, 4, and 6 h later.  
409 For all RNA decay assays, viral RNA levels were assayed by qRT-PCR. Data were  
410 analyzed using the ddCt method, where readouts of viral RNA at time t (D1-A1 spliced  
411 RNA specific primer set) were normalized to  $\beta$ -Actin levels corrected to the expected RNA  
412 level prior to decay of t hours, utilizing the published  $\beta$ -Actin  $t_{1/2}$  in CEM cells of 13.5hrs  
413 (Ct of actin at time t is corrected by  $-t/13.5$ )<sup>39</sup>. Each  $\beta$ -actin-normalized viral RNA value  
414 was then calculated as the fold change from that detected at time point 0. Statistical analysis  
415 of the rate of RNA decay was done on the log<sub>2</sub> transformation of each fold change value,  
416 using GraphPad Prism 8 software, comparing slopes of linear regression lines by analysis  
417 of covariance (ANCOVA).

418

#### 419 **Data availability**

420 All deep sequencing data have been deposited at the NCBI GEO database under  
421 accession number GSE142490.

422

#### 423 **Code and reagent availability**

424 The  $\Delta$ NAT10 cell lines, all plasmid constructs, and data analysis Perl scripts are  
425 available upon request.

426 **Acknowledgements**

427           We would like to thank Dr. Shalini Oberdoerffer for sharing the first batch of ac4C  
428 antibody and for valuable discussions, and Dr. Christopher Holley for advice and use of  
429 instruments. This research was funded in part by NIH grants R01-DA046111 to B.R.C. and  
430 U54-GM103297 to B.R.C. and R.S., along with a Duke University Center for AIDS  
431 Research (CFAR, P30-AI064518) pilot award to K.T. This research received infrastructure  
432 support from the Duke University CFAR, the UNC CFAR (P30-AI50410), and the UNC  
433 Lineberger Comprehensive Cancer Center (P30-CA16068). The following reagents were  
434 obtained through the NIH AIDS Reagent Program, Division of AIDS, NIAID, NIH: HIV-  
435 1 p24 Gag Monoclonal (#24-3) from Dr. Michael H. Malim and HIV-1 NL4-3 Infectious  
436 Molecular Clone (pNL4-3) from Dr. Malcolm Martin (# 114).

## 437 **References**

- 438 1. Roundtree, I.A., Evans, M.E., Pan, T. & He, C. Dynamic RNA modifications in  
439 gene expression regulation. *Cell* **169**, 1187-1200 (2017).
- 440 2. Kennedy, E.M., Courtney, D.G., Tsai, K. & Cullen, B.R. Viral epitranscriptomics.  
441 *J Virol* **91**, e02263-16 (2017).
- 442 3. Kennedy, E.M. et al. Posttranscriptional m(6)A editing of HIV-1 mRNAs  
443 enhances viral gene expression. *Cell Host Microbe* **19**, 675-85 (2016).
- 444 4. Lichinchi, G. et al. Dynamics of the human and viral m6A RNA methylomes  
445 during HIV-1 infection of T cells. *Nature Microbiology* **1**, 16011 (2016).
- 446 5. Courtney, D.G. et al. Epitranscriptomic enhancement of influenza A virus gene  
447 expression and replication. *Cell Host Microbe* **22**, 377-386 e5 (2017).
- 448 6. Tsai, K., Courtney, D.G. & Cullen, B.R. Addition of m6A to SV40 late mRNAs  
449 enhances viral structural gene expression and replication. *PLoS Pathog* **14**,  
450 e1006919 (2018).
- 451 7. Xue, M. et al. Viral N(6)-methyladenosine upregulates replication and  
452 pathogenesis of human respiratory syncytial virus. *Nat Commun* **10**, 4595 (2019).
- 453 8. Hao, H. et al. N6-methyladenosine modification and METTL3 modulate  
454 enterovirus 71 replication. *Nucleic Acids Res* **47**, 362-374 (2019).
- 455 9. Ye, F., Chen, E.R. & Nilsen, T.W. Kaposi's Sarcoma-Associated Herpesvirus  
456 Utilizes and Manipulates RNA N6-Adenosine Methylation To Promote Lytic  
457 Replication. *J Virol* **91**(2017).
- 458 10. Courtney, D.G. et al. Epitranscriptomic Addition of m(5)C to HIV-1 Transcripts  
459 Regulates Viral Gene Expression. *Cell Host Microbe* **26**, 217-227 e6 (2019).

- 460 11. Hesser, C.R., Karijolic, J., Dominissini, D., He, C. & Glaunsinger, B.A. N6-  
461 methyladenosine modification and the YTHDF2 reader protein play cell type  
462 specific roles in lytic viral gene expression during Kaposi's sarcoma-associated  
463 herpesvirus infection. *PLoS Pathog* **14**, e1006995 (2018).
- 464 12. Arango, D. et al. Acetylation of Cytidine in mRNA Promotes Translation  
465 Efficiency. *Cell* **175**, 1872-1886 e24 (2018).
- 466 13. Balmus, G. et al. Targeting of NAT10 enhances healthspan in a mouse model of  
467 human accelerated aging syndrome. *Nat Commun* **9**, 1700 (2018).
- 468 14. Larrieu, D., Britton, S., Demir, M., Rodriguez, R. & Jackson, S.P. Chemical  
469 inhibition of NAT10 corrects defects of laminopathic cells. *Science* **344**, 527-32  
470 (2014).
- 471 15. Ringard, M., Marchand, V., Decroly, E., Motorin, Y. & Bennasser, Y. FTSJ3 is  
472 an RNA 2'-O-methyltransferase recruited by HIV to avoid innate immune  
473 sensing. *Nature* **565**, 500-504 (2019).
- 474 16. McIntyre, W. et al. Positive-sense RNA viruses reveal the complexity and  
475 dynamics of the cellular and viral epitranscriptomes during infection. *Nucleic  
476 Acids Res* **46**, 5776-5791 (2018).
- 477 17. Sinclair, W.R. et al. Profiling Cytidine Acetylation with Specific Affinity and  
478 Reactivity. *ACS Chem Biol* **12**, 2922-2926 (2017).
- 479 18. Ito, S. et al. Human NAT10 is an ATP-dependent RNA acetyltransferase  
480 responsible for N4-acetylcytidine formation in 18 S ribosomal RNA (rRNA). *J  
481 Biol Chem* **289**, 35724-30 (2014).

- 482 19. Sharma, S. et al. Yeast Kre33 and human NAT10 are conserved 18S rRNA  
483 cytosine acetyltransferases that modify tRNAs assisted by the adaptor  
484 Tan1/THUMP1. *Nucleic Acids Res* **43**, 2242-58 (2015).
- 485 20. Hafner, M. et al. Transcriptome-wide identification of RNA-binding protein and  
486 microRNA target sites by PAR-CLIP. *Cell* **141**, 129-41 (2010).
- 487 21. Mefferd, A.L., Bogerd, H.P., Irwan, I.D. & Cullen, B.R. Insights into the  
488 mechanisms underlying the inactivation of HIV-1 proviruses by CRISPR/Cas.  
489 *Virology* **520**, 116-126 (2018).
- 490 22. Subtelny, A.O., Eichhorn, S.W., Chen, G.R., Sive, H. & Bartel, D.P. Poly(A)-tail  
491 profiling reveals an embryonic switch in translational control. *Nature* **508**, 66-71  
492 (2014).
- 493 23. Dolken, L. et al. High-resolution gene expression profiling for simultaneous  
494 kinetic parameter analysis of RNA synthesis and decay. *RNA* **14**, 1959-72 (2008).
- 495 24. Duffy, E.E. et al. Tracking Distinct RNA Populations Using Efficient and  
496 Reversible Covalent Chemistry. *Mol Cell* **59**, 858-66 (2015).
- 497 25. Sanjana, N.E., Shalem, O. & Zhang, F. Improved vectors and genome-wide  
498 libraries for CRISPR screening. *Nat Methods* **11**, 783-4 (2014).
- 499 26. Simon, J.H. et al. The Vif and Gag proteins of human immunodeficiency virus  
500 type 1 colocalize in infected human T cells. *J Virol* **71**, 5259-67 (1997).
- 501 27. Adachi, A. et al. Production of acquired immunodeficiency syndrome-associated  
502 retrovirus in human and nonhuman cells transfected with an infectious molecular  
503 clone. *J Virol* **59**, 284-91 (1986).

- 504 28. Chen, K. et al. High-resolution N(6)-methyladenosine (m(6)A) map using photo-  
505 crosslinking-assisted m(6)A sequencing. *Angew Chem Int Ed Engl* **54**, 1587-90  
506 (2015).
- 507 29. Langmead, B. Aligning short sequencing reads with Bowtie. *Curr Protoc*  
508 *Bioinformatics* **Chapter 11**, Unit 11 7 (2010).
- 509 30. Li, H. et al. The Sequence Alignment/Map format and SAMtools. *Bioinformatics*  
510 **25**, 2078-9 (2009).
- 511 31. Robinson, J.T. et al. Integrative genomics viewer. *Nat Biotechnol* **29**, 24-6 (2011).
- 512 32. Liu, J. et al. A METTL3-METTL14 complex mediates mammalian nuclear RNA  
513 N6-adenosine methylation. *Nat Chem Biol* **10**, 93-5 (2014).
- 514 33. Corcoran, D.L. et al. PARalyzer: definition of RNA binding sites from PAR-CLIP  
515 short-read sequence data. *Genome Biol* **12**, R79 (2011).
- 516 34. Dominissini, D., Moshitch-Moshkovitz, S., Salmon-Divon, M., Amariglio, N. &  
517 Rechavi, G. Transcriptome-wide mapping of N(6)-methyladenosine by m(6)A-  
518 seq based on immunocapturing and massively parallel sequencing. *Nat Protoc* **8**,  
519 176-89 (2013).
- 520 35. Olarerin-George, A.O. & Jaffrey, S.R. MetaPlotR: a Perl/R pipeline for plotting  
521 metagenes of nucleotide modifications and other transcriptomic sites.  
522 *Bioinformatics* **33**, 1563-1564 (2017).
- 523 36. Bieniasz, P.D., Fridell, R.A., Anthony, K. & Cullen, B.R. Murine CXCR-4 is a  
524 functional coreceptor for T-cell-tropic and dual-tropic strains of human  
525 immunodeficiency virus type 1. *J Virol* **71**, 7097-100 (1997).



- 526 37. Malim, M.H., Hauber, J., Le, S.Y., Maizel, J.V. & Cullen, B.R. The HIV-1 rev  
527 trans-activator acts through a structured target sequence to activate nuclear export  
528 of unspliced viral mRNA. *Nature* **338**, 254-7 (1989).
- 529 38. Emery, A., Zhou, S., Pollom, E. & Swanstrom, R. Characterizing HIV-1 Splicing  
530 by Using Next-Generation Sequencing. *J Virol* **91**, e02515-16 (2017).
- 531 39. Leclerc, G.J., Leclerc, G.M. & Barredo, J.C. Real-time RT-PCR analysis of  
532 mRNA decay: half-life of Beta-actin mRNA in human leukemia CCRF-CEM and  
533 Nalm-6 cell lines. *Cancer Cell Int* **2**, 1 (2002).

534

## Figures

**A**

Sites consistent across mRNA & vRNA:

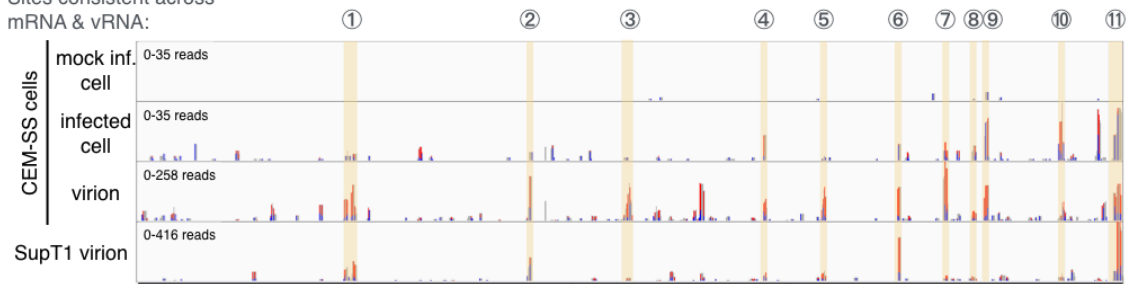

**B**

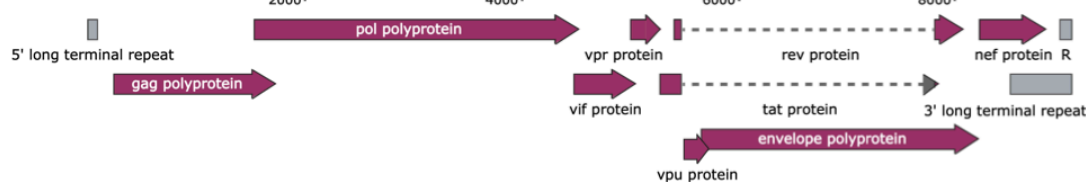

**C**

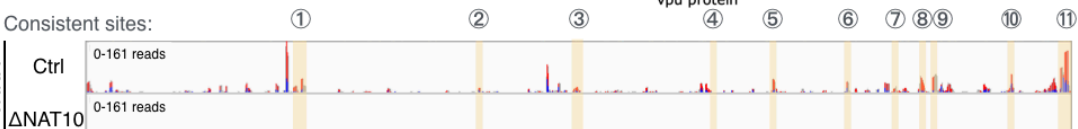

**D**

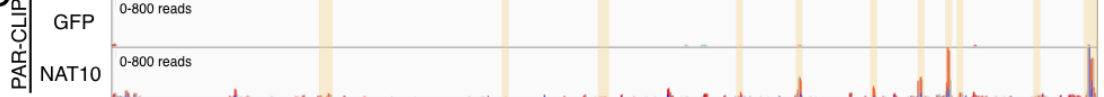

535

536 **Fig 1. NAT10-dependent ac4C is deposited at multiple locations on HIV-1 mRNAs**

537 **and virion genomic RNA. (A)** Ac4C sites were mapped by PA-ac4C-seq on the poly(A)<sup>+</sup>

538 fraction (mRNA) of mock or HIV-1 infected CEM-SS T cells, along with virion particle

539 RNA produced from HIV-1 infected Sup T1, and CEM-SS cells. (B) Schematic of the HIV-

540 1 genome organization drawn to scale (C) PA-ac4C-seq was performed on HIV-1 virion

541 RNA produced in control or ΔNAT10 CEM T cells. NAT10 knock-down is validated in

542 Fig. 3A. (D) PAR-CLIP was performed on CEM T cells stably expressing FLAG-NAT10

543 or FLAG-GFP to identify NAT10 binding sites on HIV-1 RNA. Sequence reads were

544 aligned to the HIV-1 NL4-3 genome. Consistent (across mRNA and virion) ac4C sites

545 highlighted in yellow and numbered above. 4SU-based CLIP methods result in T>C

546 conversions where protein is cross-linked to 4SU residues, here shown as red-blue bars.

547

548

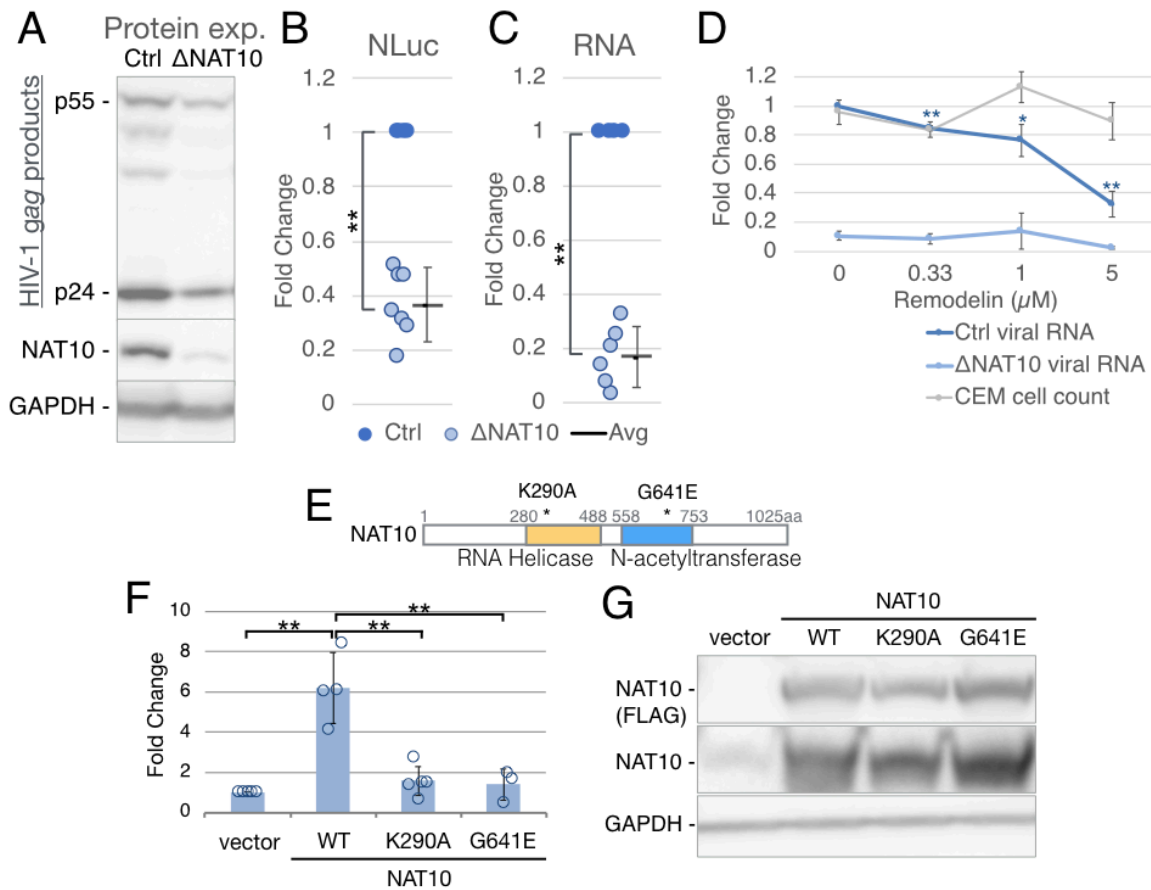

549

550 **Fig 2. NAT10 enhances the rate of HIV-1 spread in culture.**

551 (A-C) CEM cells in which the *NAT10* gene had been edited using CRISPR/Cas ( $\Delta$ NAT10),  
 552 along with control CEM cells expressing Cas9 and a non-targeting guide RNA (Ctrl), were  
 553 assayed for NAT10-associated viral replication phenotypes. (A) HIV-1 replication levels  
 554 in a spreading infection, at 3 dpi with WT NL4-3, were analyzed by Western blot for the  
 555 HIV-1 capsid protein p24 (B) WT and  $\Delta$ NAT10 cells were infected with the NL4-3NLuc  
 556 reporter virus and NLuc activity determined at 3 dpi (C) HIV-1 RNA levels in the samples  
 557 shown in panel B were determined using qRT-PCR. Three different  $\Delta$ NAT10 single cell  
 558 clones were used in panels B & C, with Ctrl cells set at 1. n=4 to 7, error bars=SD. \*\* 2-  
 559 tailed T-test,  $p < 0.01$ . (D) CEM, Ctrl, and  $\Delta$ NAT10 cells were treated with the NAT10-

560 inhibitor Remodelin. Infected CEM cells were counted at 1 dpi to determine Remodelin  
561 toxicity (shown in gray), infected Ctrl (dark blue) and  $\Delta$ NAT10 (light blue) cells were  
562 harvested at 2 dpi and viral RNA levels assayed by qRT-PCR. n=3, error bars=SD. 2-tailed  
563 T-test on Ctrl cells for each condition compared to the 0  $\mu$ M level, \*\*p<0.01, \*p<0.05. (E)  
564 Schematic of NAT10 functional domains and point mutations. (F) 293T cells were  
565 transfected with empty vector, WT NAT10 (WT), K290A or G641E mutant expression  
566 vectors. 3 days later, transfected cells were infected with the NL4-3NLuc reporter virus,  
567 and NLuc assayed 2 dpi. n=3 to 6, error bars=SD. \*\* 2-tailed T-test, p<0.01. (G) Western  
568 blot showing NAT10 over-expression, NAT10 probed with both FLAG and NAT10  
569 antibodies and GAPDH probed as a loading control.

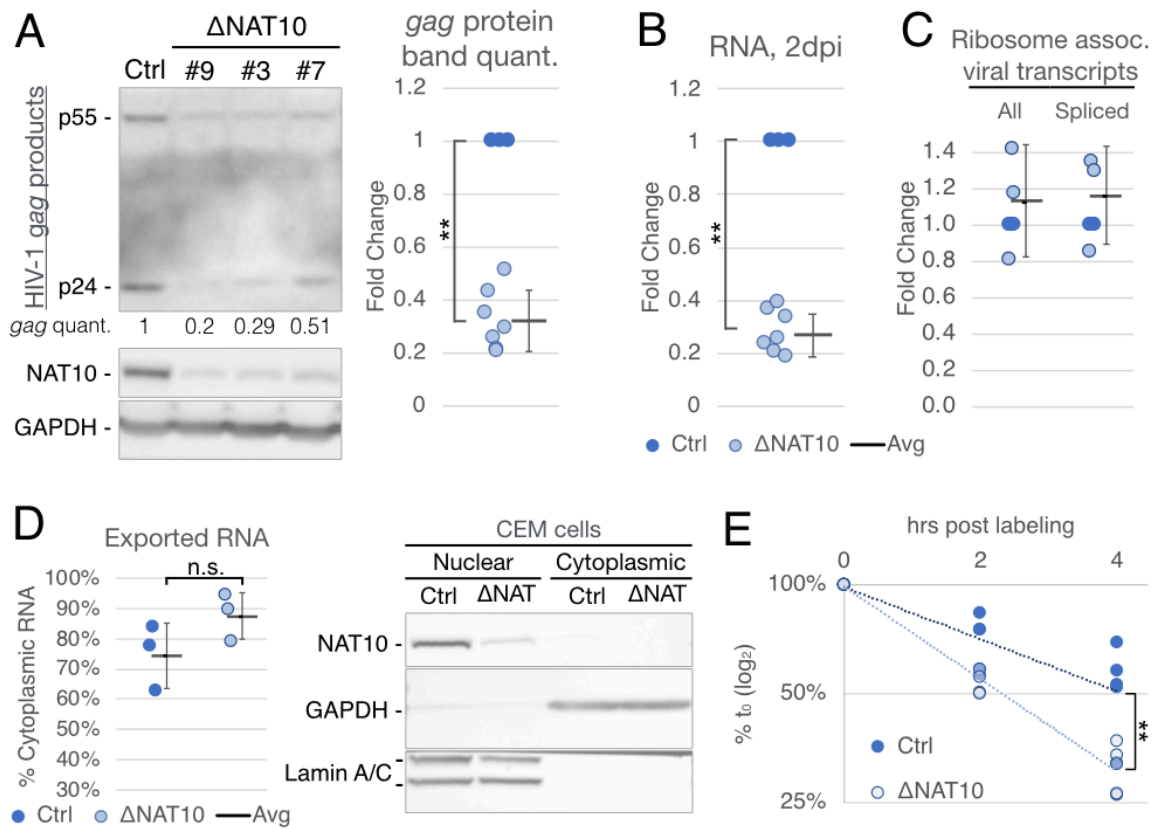

570

571 **Fig 3. NAT10 depletion reduces HIV-1 RNA levels by destabilizing viral transcripts.**

572 Ctrl (dark blue) and  $\Delta$ NAT10 (light blue) cells were infected with HIV-1, treated with the

573 reverse transcriptase (RT) inhibitor Nevirapine (NVP) at 15-16 hpi and harvested at ~48

574 hpi for the following single cycle infection assays. (A) Viral Gag levels assayed on Ctrl

575 and 3 single cell clones (#9, #3, #7) of  $\Delta$ NAT10 cells by Western blot. HIV-1 Gag band

576 intensities (p24 plus p55) were quantified, normalized to Ctrl levels (set to 1), and are

577 shown in the right hand panel (Ctrl n=3,  $\Delta$ NAT10 n=7). (B) Aliquots of the samples

578 visualized in panel A were assayed for viral RNA levels by qRT-PCR. (C) Ribosome-

579 associated viral RNAs were extracted and assayed by qRT-PCR using primer sets targeting

580 the LTR U3 region (All) and across the D1 to A1 viral splice junction (Spliced), n=3. (D)

581 Subcellular fractionation of infected Ctrl &  $\Delta$ NAT10 cells. Viral RNA in each fraction was

582 quantified by qRT-PCR and is shown as the percentage of cytoplasmic RNA over total

583 (cytoplasmic + nuclear) RNA, n=3. Fractionation validated by Western blot in the right  
584 panel, with Lamin A/C as the nuclear marker and GAPDH as the cytosolic marker.  
585 Statistical analyses shown in (A-D) used the two-tailed Student's T test, error bars=SD,  
586 \*\*p<0.01. (E) Viral RNA stability tested by 4SU-metabolic labeling, followed by isolation  
587 of 4SU<sup>+</sup> nascent RNA at 0, 2 and 4hrs post 4SU-labeling, n=5. Slopes of regression lines  
588 compared by ANCOVA, \*\*p=0.0008.

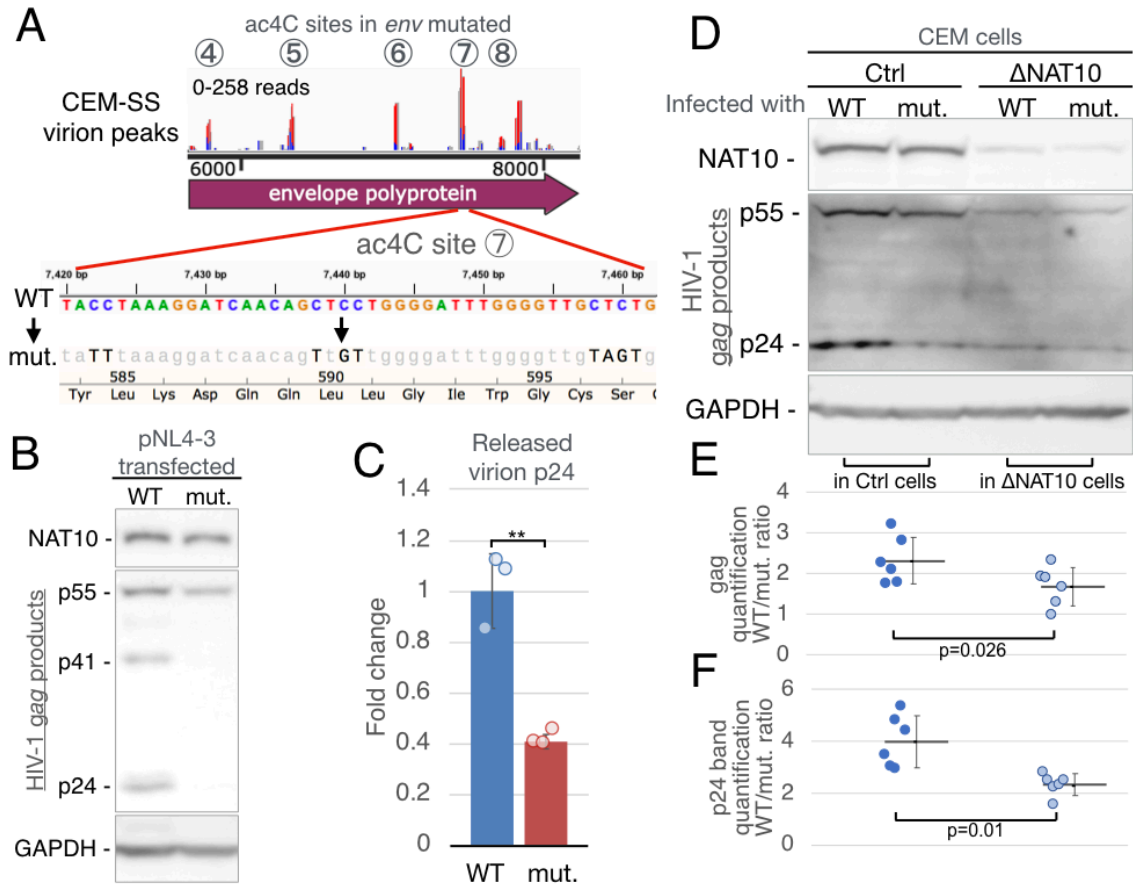

589

590 **Fig 4. Silent mutagenesis of ac4C sites in *env* diminishes viral Gag expression.**

591 (A) ac4C sites #4-8 in the HIV-1 *env* CDS were mutated to remove as many ac4C sites as  
 592 possible without changing the encoded amino acid. Example of silent mutations in ac4C  
 593 site #7 in the lower panel. (B) 293T cells were transfected with WT pNL4-3 HIV-1 (WT)  
 594 or the mutant viral plasmid (mut.) with ac4C sites in the *env* gene mutated and Gag  
 595 expression determined by Western blot. (C) Virions released into the supernatant media of  
 596 293T cells transfected with WT or mut HIV-1 expression plasmids were quantified by p24  
 597 ELISA. n=4, \*\*p=0.002 (D) WT or ac4C mut. virus were normalized using the p24 levels  
 598 determined panel C, and used to infect Ctrl & ΔNAT10 CEM cells. Viral Gag expression  
 599 from single round (NVP-treated) infections were assayed at 48 hpi by Western blot. (E)  
 600 The gag protein bands (p55+p24) from 6 repeats of panel D were quantified and the

601 WT/mut ratio from Ctrl &  $\Delta$ NAT10 CEMs plotted. (F) Similar to panel F, WT/mut. ratios  
602 of the p24 bands only. Significance determined using paired two-tailed Student's T test,  
603 n=6, error bars=SD.



604 **Supplemental Material**

605

Fig.S1

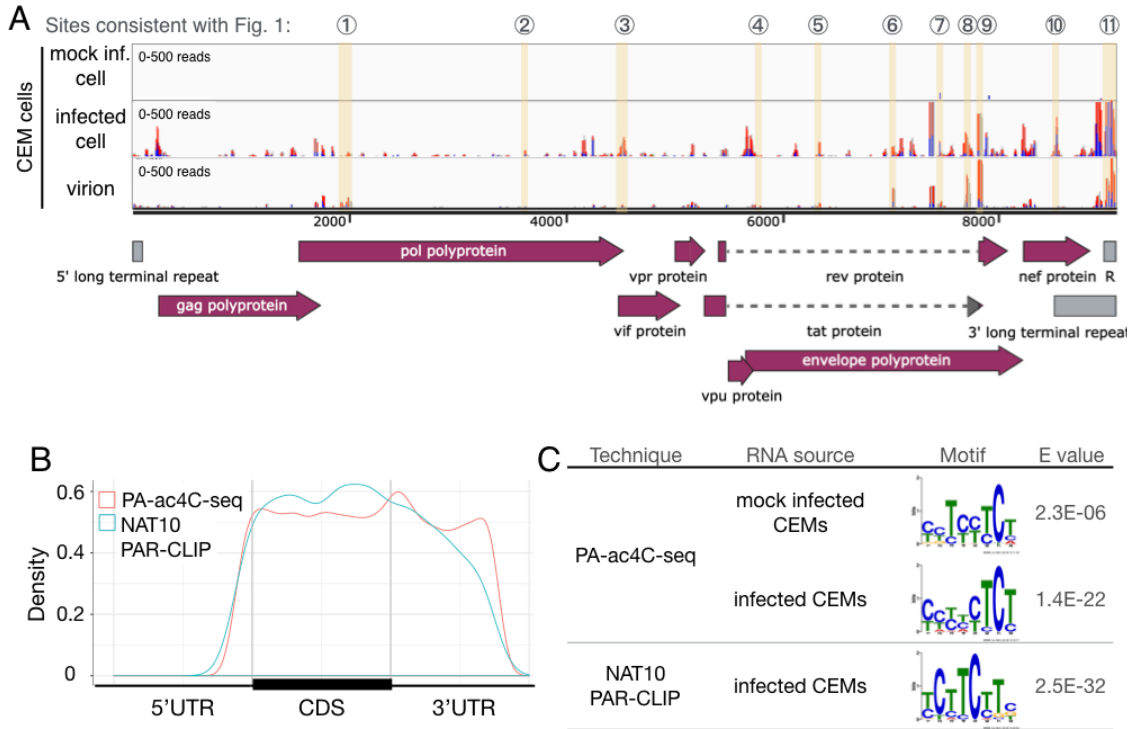

606

607 **Fig. S1. Distribution and sequence preference of cellular mRNA ac4C sites.**

608 (A) PA-ac4c-seq analysis of intracellular RNA and virion RNA recovered from CEM T  
 609 cells (B) Metagene analysis of PA-ac4C-seq (from mock-infected CEM cells)-mapped  
 610 ac4C sites and NAT10 PAR-CLIP-mapped NAT10-bound mRNA sites across the UTRs  
 611 and coding regions (CDS) of cellular genes. (C) Enriched sequence motifs in ac4C (PA-  
 612 ac4C-seq) and NAT10 (PAR-CLIP) binding sites. Data were analyzed on cDNA  
 613 sequences, thus U residues in RNA are depicted as T residues.

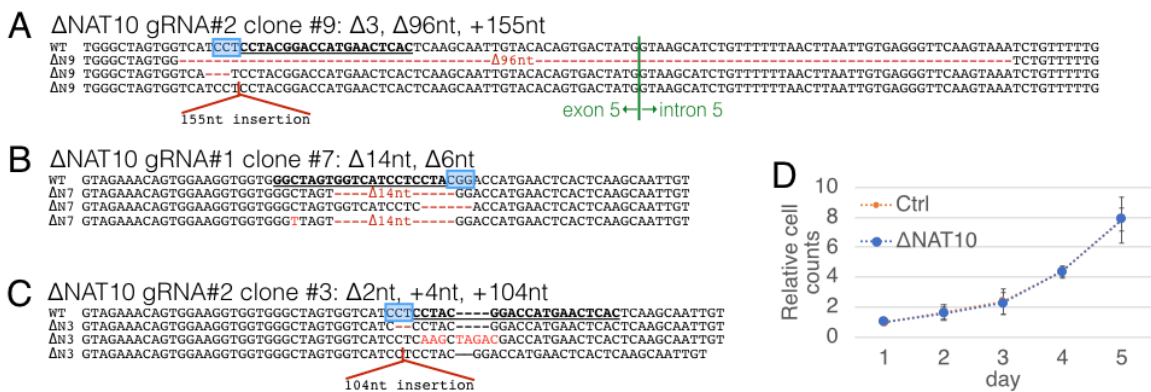

614

615 **Fig S2. CRISPR-induced edits and viability of  $\Delta$ NAT10 CEM cell lines.**

616 (A-C) The CRISPR-targeted genomic exon 5 region of three single cell clones of  $\Delta$ NAT10  
 617 CEMs were cDNA cloned and subjected to Sanger sequencing. The mutated sequences of  
 618  $\Delta$ NAT10 clones #9, #7, and #3 shown here. The Cas9 PAM, 5'-NGG-3' is shown in blue  
 619 boxes, guide RNA targeted sequence in underlined bold text, indels and substitutions  
 620 shown in red. Unless specifically stated, all assays used  $\Delta$ NAT10 clone #9. (D) Ctrl and  
 621  $\Delta$ NAT10 CEMs were cultured side by side and the cells counted for 5 days. n=3, error  
 622 bar=SD.

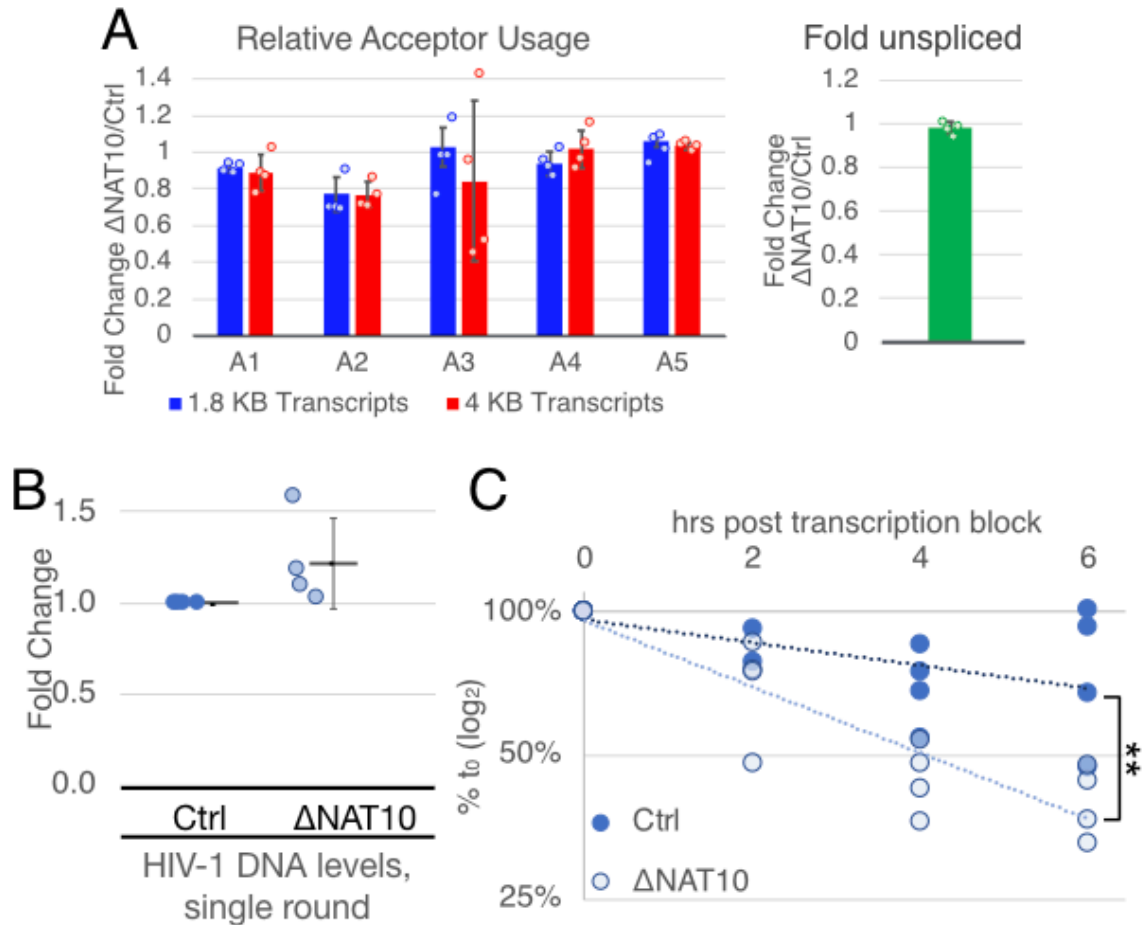

623

624 **Fig S3. Splicing, viral DNA levels, and RNA stability in single-round infected Ctrl &**  
 625  **$\Delta$ NAT10 CEM cells.**

626 (A-B) Viral transcript splice forms quantified by Primer-ID tagged deep sequencing on  
 627 incompletely spliced (~4kb), completely spliced (~1.8kb), or unspliced transcripts, plotted  
 628 as fold change of splice acceptor usage (A1-5) of  $\Delta$ NAT10 over Ctrl, n=4. (B) Viral DNA  
 629 levels in single-round infected Ctrl and  $\Delta$ NAT10 CEMs, 48 hpi, quantified by qPCR using  
 630 an LTR U3 primer set, n=4. (C) Viral RNA stability assayed in single-round infected Ctrl  
 631 and  $\Delta$ NAT10 CEMs by blocking transcription with Actinomycin D (ActD) at 2 dpi and  
 632 assaying the viral RNA levels at the shown time points after ActD treatment by qRT-PCR.  
 633 Slopes of regression lines compared by ANCOVA, n=4, \*\*p=0.0025.

**A**

```

440 atgagagatgaaggaagatgacagcacttggagagatgggggtggaatggggcaccatg 499
1  N R V K E K Y Q H L W R W G W K W G T M 20
500 cctcctgggatattgatctgtatgctacagaaatgtgggtacagcattat 559
21  L L G I L M I C S A T E K L W V T V Y Y 40
560 gggatacctgtgggaagaaacaccaccactcttttggatcagatgctaaagca 619
41  G V P V V W G K E A T T T L F C A S D A K A 60
620 tatgatacagaggtacataatgtttggccacacatgctgtgtaccacagaccccaac 679
61  Y D T E V H N V W A T H A C V P T D F N 80
680 ccacaagaatgattgtgtaaatgtgacagaaatttaacatgtggaaaaatgacatg 739
81  P Q E V V L V N V T E N F N M W K N D M 100
740 gtgacaacagatgcataggatataatcctgtttggatcaaacgctaaagcattgta 799
101 V E Q M H E D I I S L W D Q S L K P F C V 120
800 aaatlaaccccactctgttagtttaaaagcactgattgagaatgataactaac 859
121 K L T P L C V S L K C T D L K N D T N T 140
860 aatagtagtgcgggaatgataatggagaagagataaaaaactgctcttcaat 919
141 N S S S G R M I M E K G E I K N C S F N 160
920 atcagaacaagcagataaggtgacagaaatgactctttttataaactgt 979
161 I S T S I A R D K V K E Y A F F Y K L D 180
980 atagaccaatagataataacagctataggtgataagttgtaaacacactcattaca 1039
181 I V P I D N T S Y R L I S C N T S V I T 200
1040 caggcctgccaaaggtatcctttgagcccaatccatcaattatgtggcccgctgg 1099
201 Q A C P K V S F E P I P I H Y C A P A G 220
1100 ttgtcgatttaaaatgataataaagcgttcaatggaacagcactgataaactgt 1159
221 F A I L K C N N K T F N G T G G P C T N V 240
1160 agcacagatcaatgacacatcagccagcagtagtatacactcaactggttaaat 1219
241 S T V Q C T H G I R P V V S T Q L L L N 260
1220 ggcactgtagcagaagaatgtagtaatactgccaatttcaacagacatgctaaa 1280
261 G S L A E E D V V I R S A N F T D N A K 280
1280 accataatagtagcagcgaacacatctgtgaaataatgtgacaagcccaacaact 1339
281 T I I V Q L N T S V E I N C T R P N N N 300
1340 acaagaagaatgatacctgacagagggaccagggagagcattgttacaatgaaaa 1399
301 T R K S I R I Q R G P G R A F V T I G K 320
1400 atagaaatagagacaagcactgtaaacattagtagagacaatggaatgccaatt 1459
321 I G N M R Q A H C N I S R A K W N A T L 340
1460 aaacagtagtagcaaatgaagacaacattggaataataaacaactaatcttaag 1519
341 K Q I A S K L R E Q F T G N N K T I I F K 360
1520 caatcctcagaggggcaagaatgttaacgcacagcttttaattgtggagggaaatt 1579
361 Q S S G G D P E I V T H S F N C G G E F 380
1580 ttctactgtaaaccaacactgctttaaactgactgttttaactgacttggagtag 1639
381 F N S C N S T Q L T F N S T W F N S T W S T 400
1640 gaagggtaaaataacactgaaggaagtagacacacacactccactcagcaataaaaca 1699
401 E G S E N N T T E G S D T I T L P C R I K Q 420
1700 tttataacatggtggcaggaagtaggaaagcaactgtatgccctccactcagtgacaa 1759
421 F I N M W Q E V G K A M Y A P P I S G Q 440
1760 attagattacacacataactctgggtcattaaacaagagatggtgataaacaac 1819
441 I R C S S N I T G L L L T R D G G N N N 460
1820 aatgggtccagatctcagacagcagcagcagcagcagcagcagcagcagcagcag 1879
461 N G S E I F R P F G G C D H R D N W R S E 480
1880 ttataataataaagtagtaaaaatgaaccattaggagtagcaccaccaagcacaag 1939
481 L Y K Y K V V K I E P L G V A P T K A K 500
1940 agaagagtggtgacagagaaaaagacagcagtggaataggagcttggctcctgggttc 1999
501 R R V V Q R E K R A V G I G A L F L G F 520
2000 ttggagcagcagaagcactatggcgacgctcaatgacgctgacgctcagcagccaga 2059
521 L G A A G S T M G A A S M T L T V Q A R 540
2060 caattattgtctgatattgctgacagcagaaactttgctgaggctattgagcgcgaa 2119
541 Q L L S D I V Q Q Q N N L L R A I E A Q 560
2120 cagcactgttgcaactcagcctggggatacaacagctccagcagaatcctggct 2179
561 Q H L L Q L T V W G I K Q L Q A R I L A 580
2180 gtggaagataaaaggatcaacagctcctgggattgggttgaagcaaac 2239
581 V E R Y L K D C Q L L L G I W G C S G K L 600
2240 attgcaccactgctgctccttgaatgctagttggagtaataaactcctggaacagatt 2299
601 I C T T A V P W N A S W S N K S L E Q I 620
2300 tgaataacatgactggtgagtgagcagagaataaacaattacacaagcttaata 2359
621 W N N M T W M E W D R E I N N Y T S L I 640
2360 cactccttaattgaaatcgcacaaaccagcaaaaagaatgacaagaattattggaa 2419
641 H S L I E E S Q N Q Q E K N E Q E L L E 660
2420 ttagataaatggcaggtttgtgaaattggtttaaatacaaatgggtgtggtatata 2479
661 L D K W A S L W N W F N I T N W L W Y I 680
2480 aaattatttaaatgtagtaggagcctggtgagtttaagaatagtttttctgctact 2539
681 K L F I M I V G G L V G L R I V F A V L 700
2540 tctatgtgaatagattaggcaggatattcaccattatcgtttcagaccaccctccca 2599
701 S I V N R V R Q G Y S F L S F Q T H L F 720
2600 atccgaggggaccagcagcaggaagataagaagaaggtggagagagacaga 2659
721 I P R G P D R P E G I E E E G G E R D R 740
2660 gacagatccattgattgtagcagcattcctta 2692
741 D R S I R L V N G S L 751

```

**B**

```

>sal-env-ac4Cmut-Nhe (1482bp)
SalI
gggtgcgacatagcagaatagcgttactcgacagaggagcaagaatggagccag
tagtcttagactagagccctggaagcattccaggaagtcagcctaaaactgcttgc
caattgctatctgtaaaagtgctgttccattgccaagttgttctcatgcaaaagcc
ttagcactctctatggcaagaagcggagacagcagcaggaagctcatcagaaca
ctcagactcatcaagcttctctatcaaacagtaagtagtacaatgcaaacctat
aatagtagcaatagtagcatttagtagtaacaataatagcaatagttgtgtgctc
atagfaatcatagaatataggaataatfaagacaagaataatagcaggttaattg
atagcaataagaagagcagaagacagtggaatgagagtgaaaggaagatcagc
acttgtggagatgggggtggaatggggcaccactcctctgggattatgatctgt
tagtgcacagaaatgtgggtgacagtgatattggggtagcctgttggaaagga
gaaaccaccctctattgtgacagaggtgaaagattgtagacagaggtgacata
atgtttggccacacatgctgtgtaccacagaccaccaaccaagaagtagtatt
gtaaatgtgacagaaattttaacatgtggaataatgacatgtagaagacagatc
gaggataaatacagttttagggatcaaacgctaaagcctgtgtaaaataaccacc
ctctgtgttagtttaagtgactgattgagaatgatacactaaactaactagtag
cgggagaatgataatggagaagggagagataaaaactgctcttcaatcagcaca
agcataagagataaaggtgcagaagaatagcattcttataaaactgctatagtag
caatagataataccagctataggtgataagttgtaaacctcagctcatlacagagc
ctgccaaaggtatcctttgagccaaatccgatacatttggcggcggctggtttt
gcqattttaaaatgtaataaagaagcctcaatgaaacagaccatgatacaaatgtca
gcacacaaatgtacacatggaatcagggcagtagtatacactcaactcagctfaa
tggcagctcagcagaagaatgtagtaatttagactcctccaatttcaacagacatgct
aaaaaccataatagcagctgaaacacatctgtaaaataatgtgacaagaccaca
acaatcacagaataaagctatcctgacaggggacagggagagatctgttacaat
aggaacacacagatagcagcaactgtaaacattagtagagcaaatggaatggaat
ggcactttaaaacacagatagcagcaaatgag
homologous region NheI

>NheEnv-ac4Cmut-Bam (1247bp)
NheI
ggaatgccactttaaacagatagcagcaaatgaagacaactttggaataataa
aaacataatctttaagcaatcctcagggagggaccagaatgtgaacgcacagttt
aatttggaggggaattttctactgtaatcaacacaaactgttataatagtagcttgg
ttaaactagcttggagtaglgaaggggtcaataaacctgaaggaagtagacaactca
actcccatgcaataaaaacttataaacatggcaggaagtaggaaagaagcag
tatgccctccatcagtgacaataatagatgACTAGTaatattactgggTgTat
taacaagagatggtgtaatacaacaatgggtccagagatcttcagcagggagag
cgatlaggggcaactggagaagtgaaatataaataaagaatgtaaaatgaa
ccattaggagtagcaccaccaaggaagaagaagtggtgcaagagaaaaaagag
cagtggaataggagcttcttccctgggtctctgggagcagcaggaagcactatgg
cgcagcctcaatgacgctgacgtagggcagcaactatgtctgataatgtagcag
cagcaagaacatttctgagggctattgagggcacaacagatctgtgcaactcaac
tcggggcattcaaacagctccaggaagaatcctggctgtgaaagataTTTaaagga
tcaacagTtGttggggattgggggtgTACTggaactcattgaccactcgtgtg
ccttggatgctagtggagtaataaactcctggacagatttggaaataacatgacct
ggaatggatgggacagagaataaacaatacaaacgcttaatacactccttaattga
agaatcgcacaaaccagcaagaagaagaatgacaagaatatttggaaatagataaatgg
gcaagtttgggaattggtttaaatacaaacatttggTggtgcatataaataattTa
taatgtagtagaggcctggttaggttaagaatagtttctgctactcttcttagt
gaatagattaggcagggatattcaccattatcgtttcagaccaccctccaatccc
agggcccacagcagcggcaggaagaagaaggtggagagagacagagaca
gatccattcagatttagtgaacggatccta
BamHI

```

>PCR primers for amplification of gBlocks:  
oKT1206-Salac4Cb1k1 gggtgcgacatagcagaatagg  
oKT1207-ac4Cb1k1Nhe ctttaatttgcagctatctgttttaagtggtg  
oKT1208-Nheac4Cb1k2 ggaatgccactttaaacagatagc  
oKT1209-ac4Cb1k2Bam taaggatccgttcaactatcgaatg

634

635 **Fig S4. Sequence and construction of ac4C silent point mutant virus.**

636 (A) Coding sequence and translated amino acid sequence of the mutated *env* gene. Mapped

637 ac4C sites highlighted in blue, mutated nucleotides capitalized in red. (B) gBlocks and

638 amplification primers used to construct the mutant virus. Mapped ac4C sites in green,  
639 mutated nucleotides capitalized. A region of homology was designed between the two  
640 gBlocks (underlined) to facilitate recombinant PCR. Restriction enzyme sites used for  
641 cloning depicted in **bold**.
